# Supplementary material for: Nitrogen doped In2O3–ZnO nanocomposite mesoporous thin film based highly sensitive and selective ethanol sensors
Source: Royal Society of Chemistry journal article supplement (doi:10.1039/d2nr00455k), 2022-01-01
Supplement: d2nr00455k1.pdf [file d2nr00455k1.pdf]

## **Supplementary information**

### **Nitrogen doped In<sub>2</sub>O<sub>3</sub>-ZnO nanocomposite mesoporous thin film based highly sensitive and selective ethanol sensor**

*P. K. Shihabudeen and Ayan Roy Chaudhuri\**

*Materials Science Centre, Indian Institute of Technology Kharagpur, 721302 Kharagpur,  
West Bengal, India*

---

\* Corresponding author: Tel: +91-3222-283978

Electronic mail: [ayan@matsc.iitkgp.ac.in](mailto:ayan@matsc.iitkgp.ac.in) (Ayan Roy Chaudhuri)

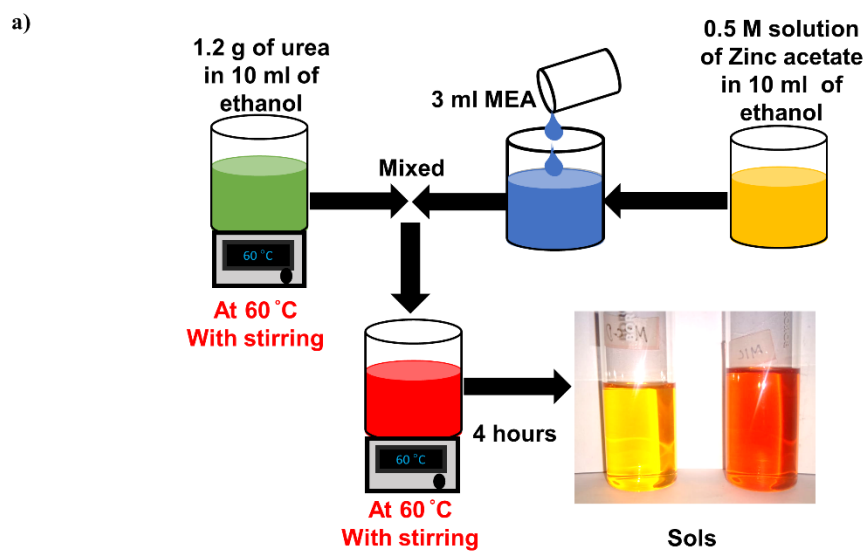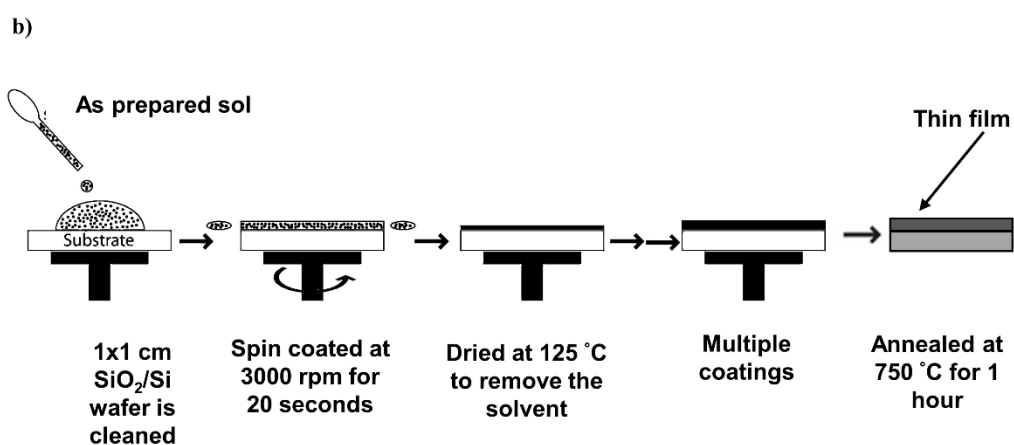

Figure S1. a) synthesis of sol and b) synthesis of the composite thin film by spin coating technique.

Table S1. Details of chemicals used for synthesis of composites

| Sl.no | Sample  | Zinc acetate (g) | Indium acetate (g) |
|-------|---------|------------------|--------------------|
| 1     | IZON-25 | 0.822            | 0.365              |
| 2     | IZON-50 | 0.549            | 0.723              |
| 3     | IZON-75 | 0.275            | 1.094              |
| 4     | IZO-50  | 0.822            | 0.365              |

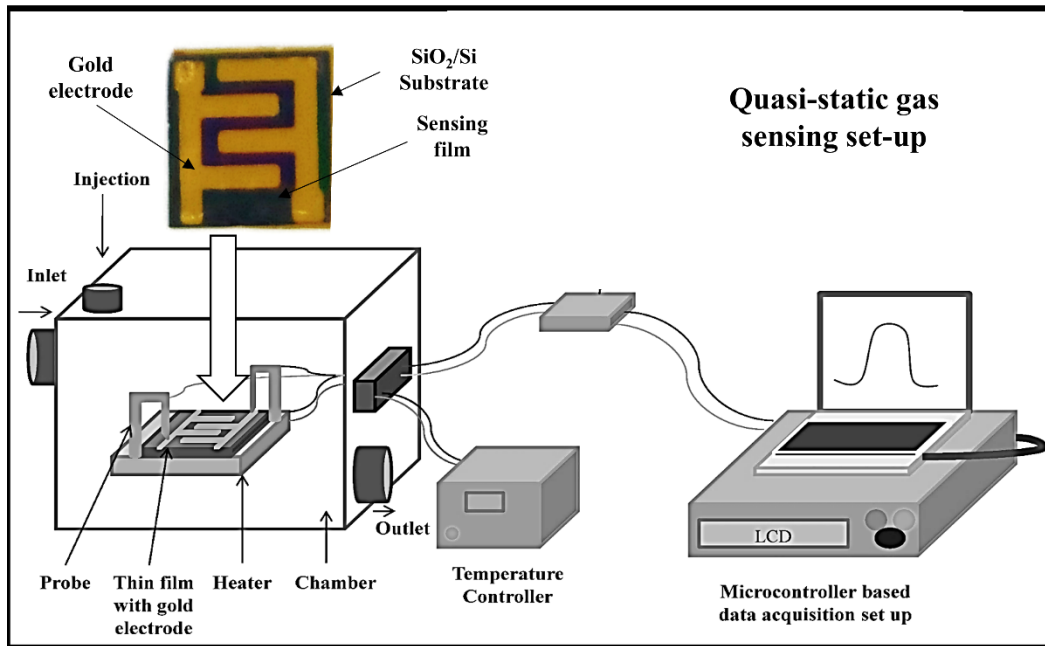

Figure S2. photograph of the fabricated device and the schematic of quasi-static gas sensing set-up.

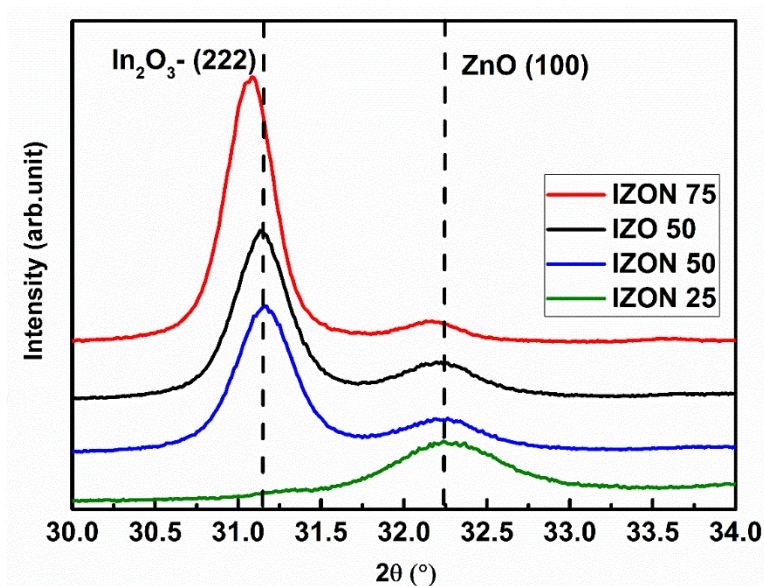

Figure S3. Shift in two major XRD peaks of composites thin films

The crystallite size of the In<sub>2</sub>O<sub>3</sub> and ZnO has been calculated for the composite thin films

using the Scherrer equation,  $D = \frac{K\lambda}{\beta \cos(\theta)}$ , Where D is the crystallite size of the thin films,  $\lambda$  is the X-ray wavelength (1.54 Å),  $\beta$  is the FWHM in radians, K is constant with a value of 0.94, and  $\theta$  is the peak position in radians. Further the micro strain ( $\epsilon$ ) along the In<sub>2</sub>O<sub>3</sub> (222)

and ZnO (100) plane of the thin films is calculated using the equation,  $\epsilon = \frac{\beta}{4 \tan \theta}$ .

Table S2. Estimated parameters from XRD analysis

| Sample  | Crystallite size, D (nm)<br>±0.5 nm |       | Cell parameters (Å)<br>±0.02 Å     |             | Strain ( $\epsilon$ ) x 10 <sup>-3</sup> |           |
|---------|-------------------------------------|-------|------------------------------------|-------------|------------------------------------------|-----------|
|         | In <sub>2</sub> O <sub>3</sub>      | ZnO   | In <sub>2</sub> O <sub>3</sub> , a | ZnO, a & c  | In <sub>2</sub> O <sub>3</sub> (222)     | ZnO (100) |
| IZON 25 | 26.18                               | 13.42 | 10.31                              | 3.24 & 5.22 | 3.17                                     | 13.3      |
| IZON 50 | 19.04                               | 10.92 | 10.22                              | 3.24 & 5.20 | 4.57                                     | 9.49      |
| IZO 50  | 20.95                               | 14.21 | 10.22                              | 3.24 & 5.20 | 4.14                                     | 7.41      |
| IZON 75 | 23.94                               | 31.51 | 10.42                              | 3.23 & 5.21 | 3.33                                     | 3.32      |

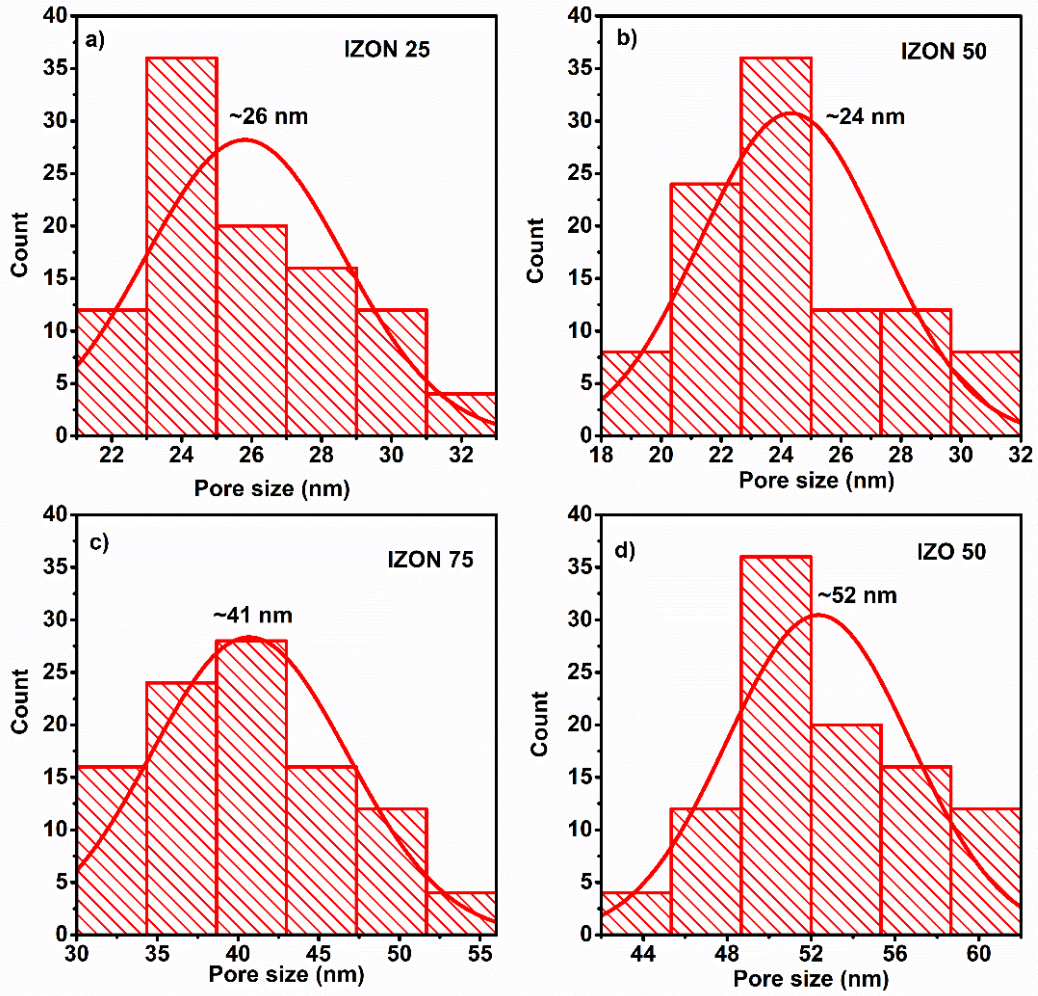

Figure S4. Surface pore size distribution of a) IZON 25, b) IZON 50, IZON 75 and IZO 50 composite thin films.

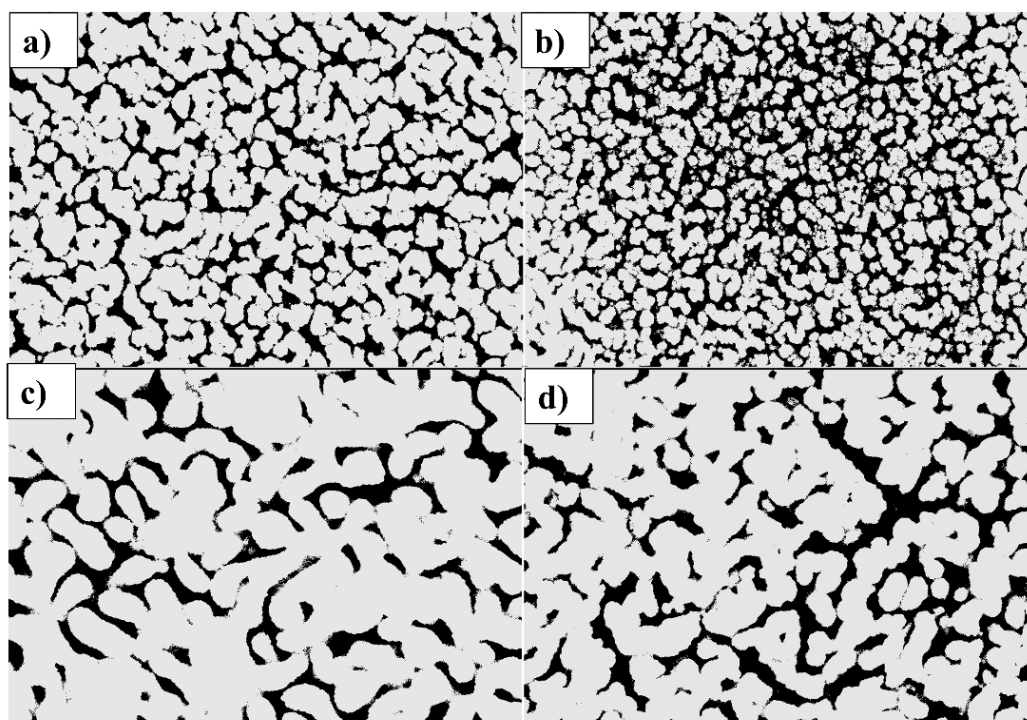

Figure S5 Processed scanning electron microscopy images of a) IZON 25, b) IZON 50, c) IZON 75 and d) IZO 50 composite thin films

Table S3. Composition of composite thin films

| Film/Atom (at%) | N    | O     | In    | Zn    |
|-----------------|------|-------|-------|-------|
| IZON-25         | 0.60 | 58.11 | 11.38 | 29.91 |
| IZON-50         | 0.60 | 61.37 | 19.21 | 18.82 |
| IZON-75         | 0.60 | 57.71 | 31.46 | 10.22 |
| IZO-50          | 0    | 61.61 | 19.52 | 18.87 |

Table S4. Sensing response, response and recovery times of various composite thin films

| Film    | Response at 200 °C (%) | Response time (s) | Recovery time (s) |
|---------|------------------------|-------------------|-------------------|
| IZON-25 | ~80                    | ~5                | ~300              |
| IZON-50 | ~94                    | ~2                | ~300              |
| IZON-75 | ~50                    | ~30               | ~300              |
| IZO-50  | ~77                    | ~9                | ~250              |

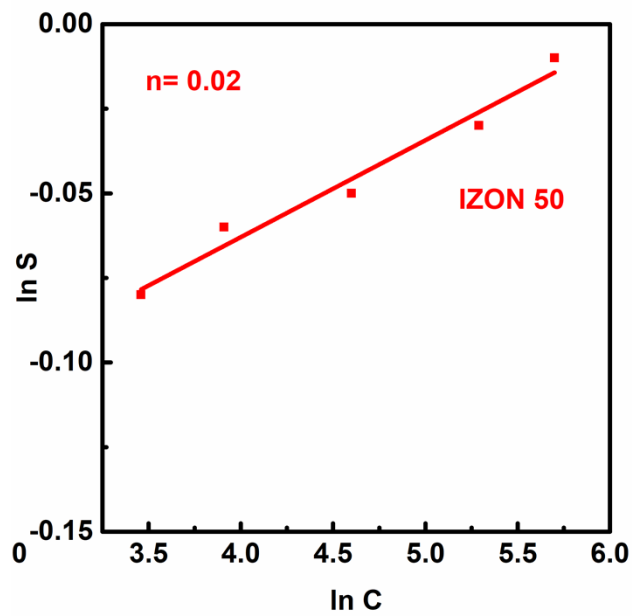

Figure S6. Sensitivity plot of IZON 50 thin film.

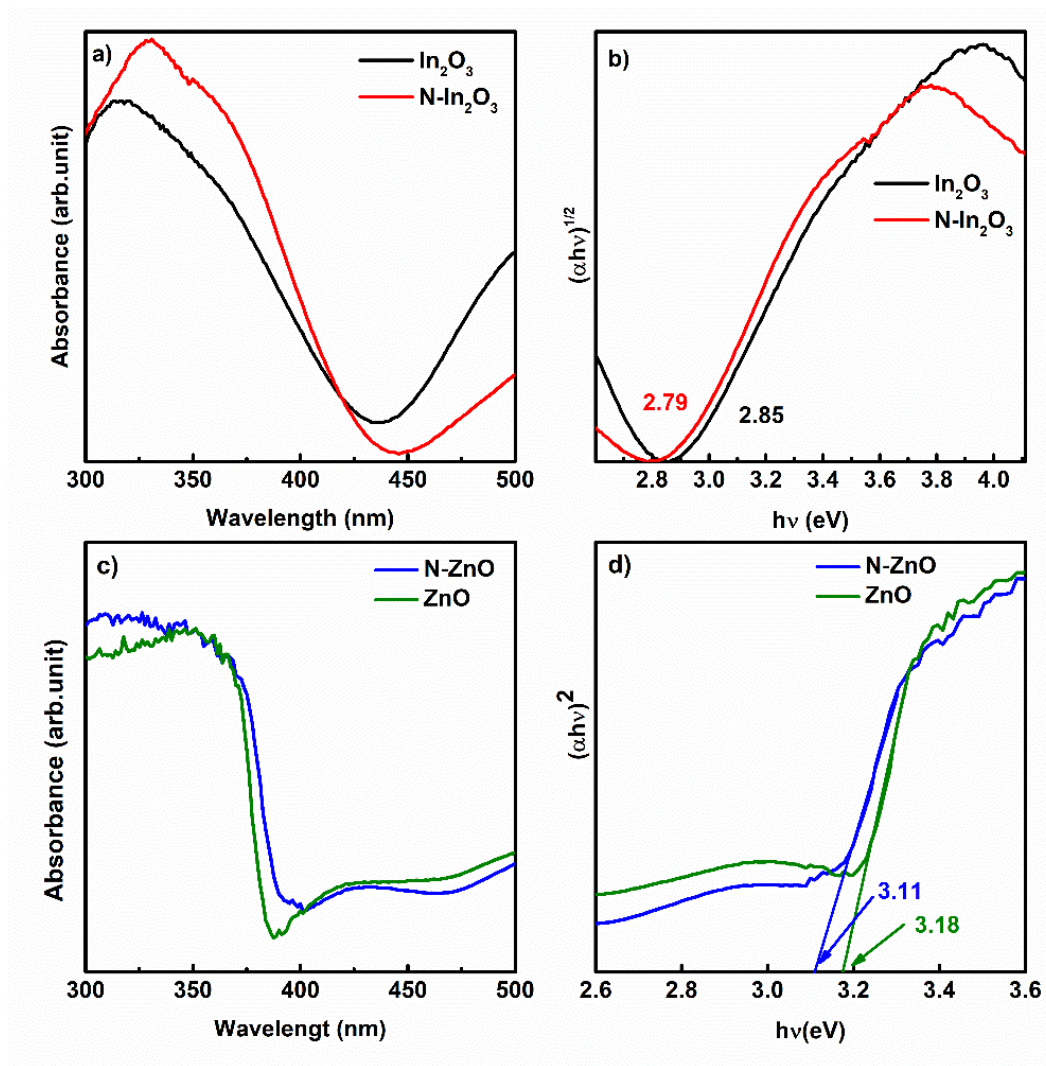

Figure S7 a&c) DRS and b&d) Tauc plot of individual metal oxide thin films.

Table S5. Sensing parameters of various thin films

| Film                             | Temperature (°C) | Response (%) |
|----------------------------------|------------------|--------------|
| IZO-50                           | 200              | ~74          |
| IZON-50                          | 200              | ~94          |
| N-ZnO                            | 225              | ~86          |
| N-In <sub>2</sub> O <sub>3</sub> | 250              | ~82          |



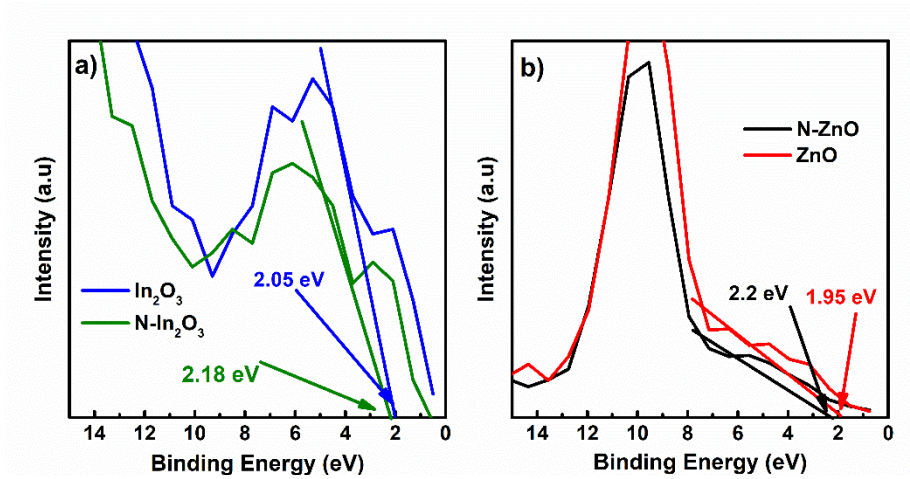

Figure S8. Valence band edge diagrams of a)  $\text{In}_2\text{O}_3$  &  $\text{N-In}_2\text{O}_3$  and b)  $\text{ZnO}$  &  $\text{N-ZnO}$
